# Supplementary material
Source: ML conference proceedings conference paper supplement (https://openaccess.thecvf.com/content/CVPR2026/html/Lee_HyCal_A_Training-Free_CVPR_2026_paper.html)
Supplement: Supplementary file 1 [file Lee_HyCal_A_Training-Free_CVPR_2026_supplemental.pdf]

# HYCAL: A Training-Free Prototype Calibration Method for Cross-Discipline Few-Shot Class-Incremental Learning

## Supplementary Material

### 7. Supplementary on the complementary roles and mutual information between cosine and Mahalanobis measures

This supplementary section provides additional analysis supporting the complementary relationship between cosine similarity and Mahalanobis distance, as formalized in Theorem 1 and Theorem 2. While both measures are computed from the same embedding pairs, they capture fundamentally different geometric and statistical aspects—angular alignment versus covariance-adjusted magnitude—which together yield richer and more discriminative information than either measure alone.

#### 7.1. Complementary roles of cosine and Mahalanobis measures

##### 7.1.1. Preliminaries and statistical independence

Let  $X, Y \in \mathbb{R}^d$  be random vectors and define their difference:

$$\Delta = X - Y.$$

We consider the following similarity measures:

$$C = \frac{X^\top Y}{\|X\| \|Y\|},$$

$$M = \sqrt{(X - Y)^\top \Sigma^{-1} (X - Y)}.$$

Cosine similarity  $C$  captures angular alignment between  $X$  and  $Y$ , while Mahalanobis distance  $M$  reflects the covariance-adjusted magnitude of their difference. Although both are derived from the same pair  $(X, Y)$ , they emphasize distinct geometric aspects.

To obtain a tractable theoretical perspective, we adopt an idealized isotropic surrogate model. Assume that

$$\Delta \sim \mathcal{N}(0, \sigma^2 I_d),$$

and that Mahalanobis distance is computed with the true covariance  $\Sigma = \sigma^2 I_d$ . In this case,

$$M = \sqrt{\Delta^\top (\sigma^2 I_d)^{-1} \Delta} = \frac{\|\Delta\|}{\sigma}.$$

Moreover, we can represent  $\Delta$  in polar form as

$$\Delta = RU,$$

where

$$R = \|\Delta\| \sim \sigma \cdot \chi_d, \quad U = \frac{\Delta}{\|\Delta\|} \in \mathbb{S}^{d-1}.$$

For an isotropic Gaussian, the magnitude  $R$  and the direction  $U$  are statistically independent:

$$R \perp U.$$

In our surrogate model, we further idealize cosine similarity and Mahalanobis distance as being driven by these independent radial and angular factors: Mahalanobis distance depends only on  $R$ , while cosine similarity depends only on an angular component (which we denote generically by  $U$ ). Formally, we model

$$C = f(U), \quad M = g(R),$$

for some measurable functions  $f$  and  $g$ . This does not claim that empirical cosine similarity is exactly a function of  $\Delta/\|\Delta\|$ , but instead captures the intuition that cosine similarity is dominantly governed by angular variation. In contrast, the Mahalanobis distance is primarily determined by radial variation.

**Theorem 1** (Independence of Cosine Similarity and Mahalanobis Distance under an Isotropic Model). *Under the isotropic surrogate model described above, cosine similarity depends only on the angular factor  $U$  and Mahalanobis distance depends only on the radial factor  $R$ :*

$$C = f(U), \quad M = g(R).$$

Since  $R \perp U$ , it follows that  $C \perp M$ , and thus their joint entropy decomposes as

$$H(C, M) = H(C) + H(M).$$

*Proof.* For an isotropic Gaussian  $\Delta \sim \mathcal{N}(0, \sigma^2 I_d)$ , the density of  $\Delta \in \mathbb{R}^d$  is rotationally invariant and depends only on  $\|\Delta\|$ . In hyperspherical coordinates  $\Delta = ru$  with  $r = \|\Delta\|$  and  $u \in \mathbb{S}^{d-1}$ , the joint density factorizes as

$$p(r, u) = c r^{d-1} \exp\left(-\frac{r^2}{2\sigma^2}\right) p(u),$$

where  $c$  is a normalization constant and  $p(u)$  is the uniform density on the unit sphere. Hence,  $R \perp U$ .

By our surrogate model assumption,  $C = f(U)$  and  $M = g(R)$  for measurable functions  $f$  and  $g$ . Since measurable functions of independent random variables remain

independent, we obtain  $C \perp M$ . Therefore, their joint entropy factorizes:

$$\begin{aligned} H(C, M) &= - \int p(c, m) \log p(c, m) \, dc \, dm \\ &= - \int p(c)p(m) \log(p(c)p(m)) \, dc \, dm \\ &= - \int p(c) \log p(c) \, dc - \int p(m) \log p(m) \, dm \\ &= H(C) + H(M). \end{aligned}$$

□

This result formalizes the idea that cosine similarity and Mahalanobis distance capture statistically independent aspects of the pair  $(X, Y)$  under an isotropic surrogate model: one is driven by angular variation, and the other by radial variation. In particular, the pair  $(C, M)$  encodes the sum of their individual entropies, reflecting complementary information about the underlying embedding geometry.

## 7.2. Mutual information interpretation

Let  $L \in \{0, 1, \dots, n\}$  denote a class label, and suppose that  $L$  depends on the relative relationship between  $C$  and  $M$ . We are interested in the mutual information quantities

$$I(L; C), \quad I(L; M), \quad I(L; C, M).$$

**Theorem 2** (Information Gain from Combination). *The mutual information between the label  $L$  and the combined similarity vector  $(C, M)$  satisfies*

$$\begin{aligned} I(L; C, M) &= I(L; C) + I(L; M | C) \\ &\geq \max\{I(L; C), I(L; M)\}. \end{aligned}$$

*Proof.* By the chain rule for mutual information, we have

$$I(L; C, M) = I(L; C) + I(L; M | C).$$

By definition of conditional mutual information,

$$I(L; M | C) = \mathbb{E}_{c \sim p(C)} \left[ D_{\text{KL}}(p(L, M | C = c) \parallel p(L | C = c) p(M | C = c)) \right].$$

and since the Kullback–Leibler divergence satisfies  $D_{\text{KL}}(\cdot \parallel \cdot) \geq 0$ , it follows that

$$I(L; M | C) \geq 0.$$

Therefore,

$$\begin{aligned} I(L; C, M) &= I(L; C) + I(L; M | C) \\ &\geq I(L; C). \end{aligned}$$

By symmetry,  $I(L; C, M) \geq I(L; M)$  as well, which yields

$$I(L; C, M) \geq \max\{I(L; C), I(L; M)\}.$$

□

Together with the independence result above, this theorem shows that cosine similarity and Mahalanobis distance are information-theoretically complementary: under the isotropic surrogate model, they encode independent angular and radial factors, and when labels depend on both, their combination  $(C, M)$  provides at least as much mutual information with  $L$  as either measure alone. This complementarity enables richer information extraction from frozen embeddings while keeping the backbone entirely fixed.

## 7.3. Real VLM embeddings: Why complementarity becomes stronger

The independence result above is derived under an idealized isotropic Gaussian surrogate, in which the angular and radial components factorize. In real pretrained VLMs, however, the embedding geometry is inherently anisotropic: feature norms exhibit heavy-tailed distributions, covariance structures vary significantly across domains, and domain shifts induce direction–magnitude distortions in heterogeneous ways [25, 27].

These anisotropic effects break the exact statistical independence between cosine similarity and Mahalanobis distance. Yet, paradoxically, this makes the two measures *more* complementary in practice. Under anisotropy, directional cues captured by cosine similarity and covariance-aware magnitude cues captured by Mahalanobis distance tend to decouple, encoding increasingly orthogonal information regarding the data distribution, especially under domain shifts [14, 26].

Therefore, the theoretical independence shown in the isotropic case should be viewed as a conceptual lower bound of complementarity. In real VLM embeddings, the geometric anisotropy amplifies the distinct information encoded by each measure, making their combination strictly more discriminative than either measure alone.

## 7.4. Theoretical–empirical connection in HYCAL

Secs. 7.1 to 7.3 establish that cosine similarity and Mahalanobis distance provide different but complementary views of prototype matching: cosine similarity captures directional alignment, whereas Mahalanobis distance measures deviation relative to class-specific covariance. HYCAL translates this observation into a practical inference rule by combining both cues when evaluating each seen class. This is particularly useful in XD-VSCIL, where heterogeneous domains arrive sequentially and often with severe imbalance. Under such conditions, domain-level asymmetry can

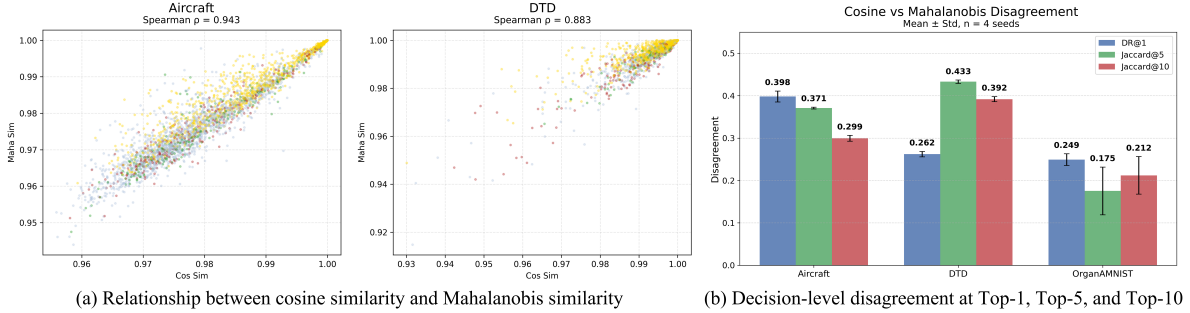

Figure 6. Cosine–Mahalanobis: (a) Relationship and (b) Ranking where cosine-correct (green) and Mahalanobis-correct (red) samples only partially overlap (yellow).

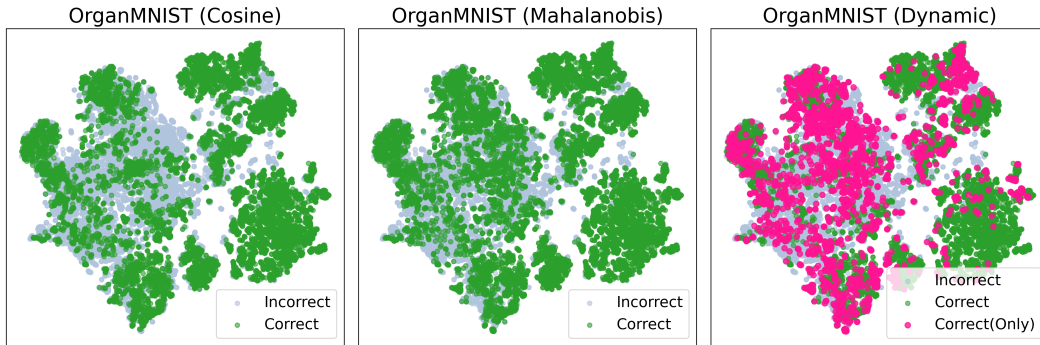

Figure 7. Qualitative comparison of distance metrics. Pink points show samples only correctly classified by dynamic summation.

distort the representation space and make a single metric overly biased toward only one geometric aspect. By reusing frozen pretrained representations and calibrating decisions at the prototype level, HYCAL reduces sensitivity to such domain-level dominance without requiring backbone adaptation or task-specific retraining.

The empirical results are consistent with this interpretation, while also clarifying the limits of the theory. Real CLIP embeddings are anisotropic, so our analysis is not intended as an exact statistical description of the feature space. Nevertheless, the diagnostics in Figs. 6 and 7 show that cosine similarity and Mahalanobis distance make complementary decisions: they disagree on nontrivial subsets of samples and recover different correct predictions, especially in sparse domains such as Aircraft, DTD, and OrganMNIST. This complementarity translates into strong behavior under challenging imbalance settings, where HYCAL remains robust on both overall metrics and low-data domains. Tab. 6 further shows that the same qualitative tendency extends across pretrained models. With OpenCLIP ViT-B/16 pretrained on DataComp-1B [12], HYCAL achieves the best performance across all three metrics, and under the X-TAIL [35] setting it attains the best Last Acc. while remaining competitive on the other metrics. Taken together, these results support the practical value of the the-

Table 6. Performance under High-scale domain imbalance.

| Method              | PTM: DataComp-1B [12] |              |              | Setting: X-TAIL [35] |              |              |
|---------------------|-----------------------|--------------|--------------|----------------------|--------------|--------------|
|                     | Last Acc.             | Avg Acc.     | SCDE         | Last Acc.            | Avg Acc.     | SCDE         |
| Primal-RAIL [35]    | 65.89                 | 58.10        | 56.40        | 73.82                | 66.79        | 69.48        |
| RanPAC [22]         | 66.20                 | 55.78        | 55.64        | 69.74                | 67.60        | 68.20        |
| KLDA [23]           | 63.95                 | 41.24        | 51.50        | <u>76.71</u>         | <b>71.38</b> | <b>72.42</b> |
| <b>HYCAL (Ours)</b> | <b>68.88</b>          | <b>59.89</b> | <b>57.94</b> | <b>77.44</b>         | 64.41        | <u>70.66</u> |

oretical complementarity developed in this section, while making clear that the theory serves primarily as intuition for real VLM embeddings rather than a strict independence claim.

## 8. Additional ablation study

To further evaluate the stability and design choices of HYCAL, we conduct ablation studies on three components: robustness to domain order, sensitivity to hyperparameters, and the effect of different image–text embedding fusion strategies. These analyses assess whether the method maintains consistent performance under different task permutations, whether its calibration behavior is sensitive to the selection of  $(\alpha, \beta)$ , and whether our sum-based image–text fusion scheme provides advantages over the commonly used concatenation strategy.

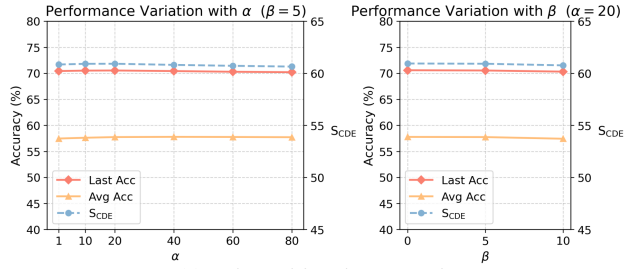

(a) Balanced-in-Class Domain

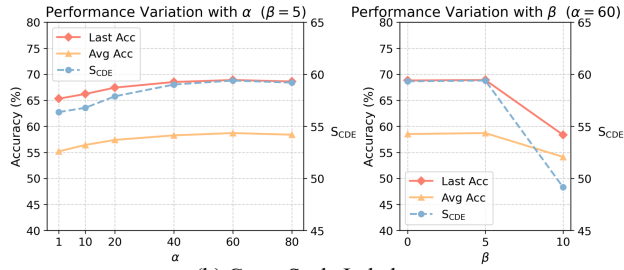

(b) Cross-Scale Imbalance

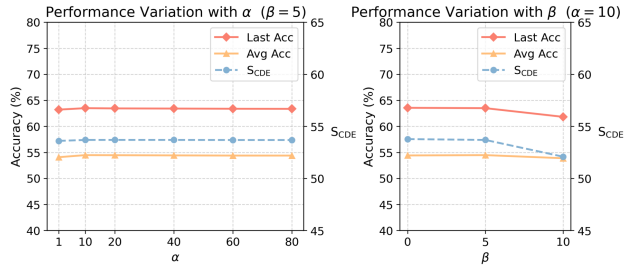

(c) High-Scale Domain Imbalance

Figure 8. Hyperparameter sensitivity analysis for  $\alpha$  and  $\beta$ . Each curve shows the performance variation when sweeping one parameter while keeping the other fixed.

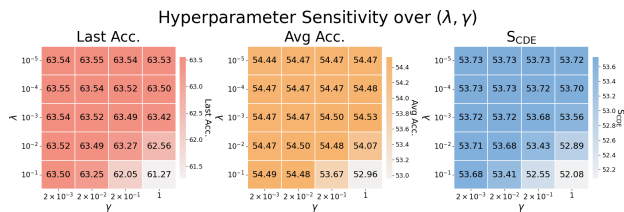

Figure 9. Hyperparameter sensitivity analysis for  $\lambda$  and  $\gamma$  under the High-scale domain imbalance setting. Heatmaps show Last Acc., Avg Acc., and  $S_{CDE}$  over different  $(\lambda, \gamma)$  configurations.

## 8.1. Robustness to domain order

To examine the robustness of each method under variations in domain sequences, we evaluate all approaches across four random domain orders, derived from fixed random seeds  $\{0, 1, 42, 1993\}$ . Each seed generates a unique permutation of the eight domains—Aircraft, ArtBench, DTD, EuroSAT, Galaxy, MNIST, Organ, and Flower—which are

Table 7. Comparison of fusion strategies under three domain conditions.

| Fusion                             | Last Acc.                          | Avg Acc.                           | $S_{CDE}$                          |
|------------------------------------|------------------------------------|------------------------------------|------------------------------------|
| <b>Balanced-in-Class Domain</b>    |                                    |                                    |                                    |
| Concat                             | $70.25 \pm 0.20$                   | $57.33 \pm 0.32$                   | $60.70 \pm 0.15$                   |
| <b>Sum (Ours)</b>                  | <b><math>70.54 \pm 0.23</math></b> | <b><math>57.75 \pm 0.45</math></b> | <b><math>60.92 \pm 0.17</math></b> |
| <b>Cross-Scale Imbalance</b>       |                                    |                                    |                                    |
| Concat                             | $68.30 \pm 1.02$                   | $57.96 \pm 1.16$                   | $58.95 \pm 0.79$                   |
| <b>Sum (Ours)</b>                  | <b><math>68.69 \pm 0.44</math></b> | <b><math>58.43 \pm 0.51</math></b> | <b><math>59.24 \pm 0.41</math></b> |
| <b>High-Scale Domain Imbalance</b> |                                    |                                    |                                    |
| Concat                             | $63.06 \pm 0.63$                   | $53.94 \pm 0.76$                   | $53.39 \pm 0.71$                   |
| <b>Sum (Ours)</b>                  | <b><math>63.50 \pm 0.73</math></b> | <b><math>54.48 \pm 0.78</math></b> | <b><math>53.70 \pm 0.74</math></b> |

presented sequentially as incremental tasks. These four permutations are referred to as Random order I–IV.

- *Random order I (seed = 0)*  
Galaxy  $\rightarrow$  ArtBench  $\rightarrow$  MNIST  $\rightarrow$  DTD  $\rightarrow$  Aircraft  $\rightarrow$  EuroSAT  $\rightarrow$  Flower  $\rightarrow$  Organ
- *Random order II (seed = 1)*  
EuroSAT  $\rightarrow$  Organ  $\rightarrow$  ArtBench  $\rightarrow$  MNIST  $\rightarrow$  Flower  $\rightarrow$  Aircraft  $\rightarrow$  Galaxy  $\rightarrow$  DTD
- *Random order III (seed = 42)*  
EuroSAT  $\rightarrow$  Galaxy  $\rightarrow$  Organ  $\rightarrow$  Flower  $\rightarrow$  DTD  $\rightarrow$  MNIST  $\rightarrow$  Aircraft  $\rightarrow$  ArtBench
- *Random order IV (seed = 1993)*  
ArtBench  $\rightarrow$  MNIST  $\rightarrow$  Organ  $\rightarrow$  Aircraft  $\rightarrow$  EuroSAT  $\rightarrow$  DTD  $\rightarrow$  Galaxy  $\rightarrow$  Flower

The overall performance of all compared methods under Random order I–IV is summarized in Tab. 8, covering three XD-VSCIL settings.

Across all domain orders and settings, HYCAL consistently achieves the highest performance, indicating that its calibration mechanism remains stable and effective regardless of task permutation. Furthermore, to provide a more fine-grained perspective, Tab. 9 reports the class-wise performance under the High-scale domain imbalanced setting for each of the four random domain orders.

## 8.2. Hyperparameter sensitivity

### 8.2.1. Sensitivity to fusion weights $\alpha$ and $\beta$

We examine the influence of the hyperparameters  $\alpha$  and  $\beta$  by evaluating performance across the search ranges  $\alpha \in \{1, 10, 20, 40, 60, 80\}$  and  $\beta \in \{0, 5, 10\}$ . Overall, HYCAL shows stable performance across this hyperparameter space, with calibration strength varying smoothly as the activation point and smoothness parameters change. The effect of varying  $\alpha$  and  $\beta$  is visualized in Fig. 8.

Across the examined range, performance is generally robust with respect to  $\alpha$ , indicating that the calibration activation point does not strongly influence the overall behav-

Table 8. Performance comparison across random-order domain setting. Results are averaged over 4 seeds with 95% confidence intervals in subscripts.

|                                    | <i>Random Order I</i>            |                                  |                                  | <i>Random Order II</i>           |                                  |                                  | <i>Random Order III</i>          |                                  |                                  | <i>Random Order IV</i>           |                                  |                                  |
|------------------------------------|----------------------------------|----------------------------------|----------------------------------|----------------------------------|----------------------------------|----------------------------------|----------------------------------|----------------------------------|----------------------------------|----------------------------------|----------------------------------|----------------------------------|
|                                    | Last Acc.                        | Avg Acc.                         | S <sub>CDE</sub>                 | Last Acc.                        | Avg Acc.                         | S <sub>CDE</sub>                 | Last Acc.                        | Avg Acc.                         | S <sub>CDE</sub>                 | Last Acc.                        | Avg Acc.                         | S <sub>CDE</sub>                 |
| <b>Balanced-in-Class Domain</b>    |                                  |                                  |                                  |                                  |                                  |                                  |                                  |                                  |                                  |                                  |                                  |                                  |
| Primal-RAIL [35]                   | 67.90 $\pm$ 0.59                 | 63.53 $\pm$ 0.85                 | 59.77 $\pm$ 0.40                 | 67.67 $\pm$ 0.38                 | 76.41 $\pm$ 0.31                 | 59.45 $\pm$ 0.26                 | 67.63 $\pm$ 0.87                 | 74.26 $\pm$ 1.00                 | 59.42 $\pm$ 0.51                 | 67.58 $\pm$ 0.56                 | 68.18 $\pm$ 0.38                 | 59.78 $\pm$ 0.40                 |
| FeCAM [6]                          | 15.26 $\pm$ 2.99                 | 18.17 $\pm$ 2.30                 | 10.16 $\pm$ 1.99                 | 12.63 $\pm$ 2.07                 | 21.95 $\pm$ 6.73                 | 10.24 $\pm$ 1.20                 | 13.97 $\pm$ 4.85                 | 20.81 $\pm$ 5.63                 | 9.30 $\pm$ 3.23                  | 11.70 $\pm$ 5.90                 | 27.09 $\pm$ 7.01                 | 12.90 $\pm$ 4.08                 |
| RanPAC [22]                        | 67.60 $\pm$ 0.25                 | 63.43 $\pm$ 0.13                 | 59.13 $\pm$ 0.17                 | 67.21 $\pm$ 1.00                 | 75.84 $\pm$ 1.27                 | 59.05 $\pm$ 0.63                 | 66.03 $\pm$ 3.00                 | 74.16 $\pm$ 0.18                 | 58.71 $\pm$ 1.16                 | 67.30 $\pm$ 0.42                 | 66.81 $\pm$ 0.60                 | 59.04 $\pm$ 0.20                 |
| KLDA [23]                          | 70.80 $\pm$ 0.30                 | 51.39 $\pm$ 0.36                 | 56.41 $\pm$ 0.06                 | 70.14 $\pm$ 0.21                 | 58.11 $\pm$ 0.47                 | 53.47 $\pm$ 0.28                 | 70.56 $\pm$ 0.59                 | 57.61 $\pm$ 0.66                 | 55.04 $\pm$ 0.42                 | 70.50 $\pm$ 0.59                 | 53.95 $\pm$ 0.27                 | 54.42 $\pm$ 0.37                 |
| <b>HYCAL (Ours)</b>                | <u>70.58<math>\pm</math>0.32</u> | <u>64.40<math>\pm</math>0.59</u> | <u>60.91<math>\pm</math>0.23</u> | <u>70.53<math>\pm</math>0.24</u> | <u>78.53<math>\pm</math>0.33</u> | <u>60.86<math>\pm</math>0.16</u> | <u>70.69<math>\pm</math>0.38</u> | <u>76.18<math>\pm</math>0.24</u> | <u>61.07<math>\pm</math>0.27</u> | <u>70.65<math>\pm</math>0.30</u> | <u>70.24<math>\pm</math>0.35</u> | <u>60.95<math>\pm</math>0.23</u> |
| <b>Cross-Scale Imbalance</b>       |                                  |                                  |                                  |                                  |                                  |                                  |                                  |                                  |                                  |                                  |                                  |                                  |
| Primal-RAIL [35]                   | 58.40 $\pm$ 1.54                 | 53.57 $\pm$ 3.12                 | 52.76 $\pm$ 1.65                 | 58.31 $\pm$ 1.18                 | 67.40 $\pm$ 1.81                 | 52.74 $\pm$ 1.25                 | 58.09 $\pm$ 1.16                 | 64.70 $\pm$ 1.94                 | 52.05 $\pm$ 1.49                 | 58.14 $\pm$ 0.68                 | 59.18 $\pm$ 0.56                 | 52.94 $\pm$ 0.92                 |
| FeCAM [6]                          | 16.65 $\pm$ 3.51                 | 19.75 $\pm$ 5.18                 | 13.41 $\pm$ 3.88                 | 17.56 $\pm$ 6.27                 | 22.46 $\pm$ 10.36                | 13.57 $\pm$ 4.80                 | 16.98 $\pm$ 3.92                 | 20.12 $\pm$ 7.07                 | 13.03 $\pm$ 3.41                 | 17.31 $\pm$ 2.68                 | 21.23 $\pm$ 6.35                 | 13.85 $\pm$ 2.13                 |
| RanPAC [22]                        | 61.77 $\pm$ 6.12                 | 56.97 $\pm$ 4.13                 | 57.49 $\pm$ 4.03                 | 59.27 $\pm$ 7.85                 | 69.77 $\pm$ 3.21                 | 55.11 $\pm$ 4.44                 | 59.39 $\pm$ 7.56                 | 68.39 $\pm$ 3.33                 | 56.46 $\pm$ 4.52                 | 61.50 $\pm$ 5.64                 | 61.49 $\pm$ 3.46                 | 54.98 $\pm$ 2.97                 |
| KLDA [23]                          | 69.26 $\pm$ 0.44                 | 43.53 $\pm$ 0.74                 | 48.14 $\pm$ 0.90                 | 69.34 $\pm$ 0.78                 | 46.79 $\pm$ 0.61                 | 47.68 $\pm$ 0.36                 | 69.31 $\pm$ 0.16                 | 47.67 $\pm$ 0.38                 | 48.29 $\pm$ 0.39                 | 69.12 $\pm$ 1.04                 | 44.27 $\pm$ 0.55                 | 46.76 $\pm$ 1.18                 |
| <b>HYCAL (Ours)</b>                | <u>68.69<math>\pm</math>0.96</u> | <u>61.27<math>\pm</math>1.76</u> | <u>58.99<math>\pm</math>0.71</u> | <u>68.60<math>\pm</math>0.58</u> | <u>73.70<math>\pm</math>0.35</u> | <u>58.99<math>\pm</math>0.46</u> | <u>68.64<math>\pm</math>0.85</u> | <u>71.94<math>\pm</math>0.81</u> | <u>59.06<math>\pm</math>0.76</u> | <u>68.64<math>\pm</math>1.39</u> | <u>66.52<math>\pm</math>1.06</u> | <u>58.97<math>\pm</math>1.08</u> |
| <b>High-Scale Domain Imbalance</b> |                                  |                                  |                                  |                                  |                                  |                                  |                                  |                                  |                                  |                                  |                                  |                                  |
| Primal-RAIL [35]                   | 59.80 $\pm$ 1.18                 | 52.60 $\pm$ 3.58                 | 52.18 $\pm$ 1.23                 | 59.28 $\pm$ 1.57                 | 65.78 $\pm$ 1.53                 | 51.51 $\pm$ 1.38                 | 59.62 $\pm$ 0.55                 | 61.48 $\pm$ 1.27                 | 52.10 $\pm$ 0.45                 | 60.28 $\pm$ 0.61                 | 61.58 $\pm$ 0.48                 | 52.74 $\pm$ 0.60                 |
| FeCAM [6]                          | 5.68 $\pm$ 0.73                  | 8.93 $\pm$ 0.74                  | 2.53 $\pm$ 0.21                  | 5.53 $\pm$ 1.31                  | 7.90 $\pm$ 0.25                  | 2.70 $\pm$ 2.70                  | 5.66 $\pm$ 0.40                  | 8.64 $\pm$ 3.29                  | 2.35 $\pm$ 0.56                  | 6.00 $\pm$ 1.11                  | 10.15 $\pm$ 1.25                 | 2.94 $\pm$ 0.57                  |
| RanPAC [22]                        | 59.80 $\pm$ 1.68                 | 51.61 $\pm$ 1.85                 | 54.40 $\pm$ 1.62                 | 59.79 $\pm$ 1.38                 | 65.28 $\pm$ 1.53                 | 52.81 $\pm$ 0.65                 | 59.77 $\pm$ 1.51                 | 63.91 $\pm$ 1.21                 | 54.37 $\pm$ 1.12                 | 60.31 $\pm$ 0.63                 | 56.08 $\pm$ 2.20                 | 51.24 $\pm$ 0.91                 |
| KLDA [23]                          | 61.68 $\pm$ 1.24                 | 31.03 $\pm$ 0.81                 | 41.85 $\pm$ 0.94                 | 60.67 $\pm$ 1.13                 | 32.89 $\pm$ 0.74                 | 34.25 $\pm$ 1.08                 | 61.13 $\pm$ 0.52                 | 39.60 $\pm$ 1.12                 | 40.81 $\pm$ 0.28                 | 60.99 $\pm$ 0.68                 | 31.44 $\pm$ 1.53                 | 39.28 $\pm$ 0.51                 |
| <b>HYCAL (Ours)</b>                | <u>63.39<math>\pm</math>0.48</u> | <u>54.96<math>\pm</math>0.81</u> | <u>53.47<math>\pm</math>0.37</u> | <u>63.01<math>\pm</math>1.08</u> | <u>65.71<math>\pm</math>1.17</u> | <u>53.13<math>\pm</math>0.94</u> | <u>63.15<math>\pm</math>0.74</u> | <u>64.73<math>\pm</math>1.70</u> | <u>53.15<math>\pm</math>0.73</u> | <u>63.03<math>\pm</math>1.11</u> | <u>59.69<math>\pm</math>1.70</u> | <u>53.06<math>\pm</math>1.22</u> |

ior of the method. In contrast,  $\beta$  exhibits a clearer trend: larger values relax the threshold that determines when Mahalanobis distance becomes active, effectively reducing its contribution and allowing cosine similarity to dominate. As a result, performance consistently drops when moving from small values such as  $\beta = 0, 5$  to higher values like  $\beta = 10$ , indicating that weakening this threshold diminishes the benefit obtained from the Mahalanobis component.

### 8.2.2. Sensitivity to covariance regularization ( $\lambda$ and $\gamma$ )

We also examine the influence of the covariance-regularization parameters  $\lambda$  and  $\gamma$  in Eq. (10). For this analysis, we fix  $\alpha = 10$  and  $\beta = 5$ , and evaluate the method under the High-scale domain imbalance setting. We use  $\lambda = 10^{-4}$  and  $\gamma = 1$  by default, and vary  $\lambda$  from  $10^{-1}$  to  $10^{-5}$  and  $\gamma$  from 1 to  $2 \times 10^{-3}$ , as shown in Fig. 9. Overall, performance remains stable across a wide range of moderate settings, indicating that HYCAL does not require delicate tuning of these parameters.

### 8.3. Fusion strategies

We compare two image-text fusion strategies in Tab. 7: summation, which preserves the 512-dimensional CLIP embedding, and concatenation, which corresponds to the 1024-dimensional representation. Across all settings, the sum-based fusion consistently achieves better performance than the concatenation fusion.

## 9. Efficiency analysis

Because HYCAL keeps the pretrained backbone frozen and updates only class prototypes and regularized precision ma-

trices for newly introduced classes, its computational cost scales with the number of new classes rather than with full model retraining. Unlike prior approaches that recompute statistics over all classes or domains in XD-VSCIL, HYCAL computes and stores covariance-related statistics only for newly added classes while reusing previously constructed prototypes. This design yields linear growth in both memory and computation as the class set expands, making the method well suited to incremental deployment.

This efficiency is also reflected in practice. When 10 new classes are added, HYCAL requires only 5.4 GFLOPs, whereas full retraining in Primal-RAIL requires 12 GFLOPs. The required storage remains moderate, amounting to 301 MB when maintaining statistics for  $C = 300$  classes. In addition, prototype construction and covariance estimation are independent across classes, enabling straightforward parallelization across newly introduced categories. Taken together, these properties make HYCAL an efficient and scalable alternative for XD-VSCIL, especially in settings where new classes or domains must be incorporated quickly without repeated parameter optimization.

## 10. Detailed experimental setting

### 10.1. Implementation details

We use the Vision Transformer (ViT-B/16) model with a frozen CLIP text encoder for all experiments. The model weights are loaded from the openai/clip-vit-base-patch16 checkpoint. The image encoder’s parameters are kept frozen throughout all experiments. All experiments were conducted using Py-

Torch version 2.1.1. All training and evaluation runs were performed on a single NVIDIA GeForce RTX 3090 GPU. All images are resized to  $224 \times 224$  and normalized using standard CLIP statistics.

HYCAL is implemented on frozen CLIP ViT-B/16 [28] features using the original 512-dimensional embedding, whereas Primal-RAIL and other training-free baselines operate on 1024-dimensional embeddings. This setup ensures a fair comparison by contrasting HYCAL’s training-free, low-dimensional configuration against both training-free and fully trainable alternatives.

To ensure the robustness of our results, all experiments were run four times with different random seeds:  $\{0, 1, 42, 1993\}$ . These seeds control the initialization of any trainable parameters, the selection of few-shot examples, and the order of data shuffling during training. The results reported in the main paper are the mean and standard deviation over these four runs.

HYCAL uses two fusion weights hyperparameters,  $\alpha$  and  $\beta$ . We perform a lightweight grid search over  $\alpha \in \{1, 10, 20, 40, 60, 80\}$  and  $\beta \in \{0, 5, 10\}$  and select the best configuration for each setting. For XD-VSCIL, we set  $(\alpha, \beta) = (20, 5)$  for the Balanced-in-class domain setting,  $(60, 5)$  for the Cross-scale imbalance setting, and  $(10, 5)$  for the High-scale domain imbalance setting. For FSCIL, we use  $(1, 0)$  in the 5-shot case to allow immediate activation under extremely sparse data, and  $(10, 5)$  for the 10-, 15-, and 20-shot settings. We use  $\lambda = 10^{-4}$  and  $\gamma = 1$  in all reported experiments.

## 10.2. Evaluation metrics

We report three metrics: Last accuracy, Average accuracy, and the proposed  $S_{CDE}$ . As  $S_{CDE}$  is formally defined and analyzed in the main text, we provide concise descriptions of the remaining two metrics. Last accuracy denotes the Top-1 accuracy on the final task after all incremental stages and reflects the model’s ability to retain previously learned knowledge. Average accuracy is computed as the mean Top-1 accuracy across all tasks,

$$\text{Avg Acc.} = \frac{1}{\mathcal{T}} \sum_{t=1}^{\mathcal{T}} \text{Acc}(t),$$

where  $\mathcal{T}$  is the total number of steps, and provides a summary of overall performance throughout the entire learning trajectory.

## 10.3. XD-VSCIL settings

We evaluate our training-free hybrid calibration method HYCAL by comparing it against both training-free and trainable baselines. As training-free approaches, we include FeCAM [6], RanPAC [22], and KLDA [23], which

represent recent state-of-the-art methods relying solely on frozen visual encoders. For the trainable baseline, we adopt Primal-RAIL [35] and report its performance as a reference point for methods that fine-tune task-specific modules.

The training-sample distributions for three XD-VSCIL settings are illustrated in Fig. 3(a)–(c), which highlight the distinct balance/imbalance patterns observed in each setting. In the Cross-scale imbalance setting, a variable number of training samples per class ( $K_c$ ) is used, and the exact values depend on the random seed. For reference, Tab. 10 and Tab. 11 report the specific  $K_c$  values employed when the random seed is set to 42.

### 10.3.1. FSCIL setting.

We follow the standard few-shot evaluation protocol. For each dataset, we conduct experiments in 5, 10, 15, 20-shot settings. In a  $K$ -shot setting, we randomly sample  $K$  images per class from the original training set.

## 11. Numerical results of Balanced-in-class domain and Cross-scale imbalance settings

For completeness, we provide the numerical values for the Balanced-in-class domain and Cross-scale imbalance settings. The Balanced-in-Class Domain setting results are provided in Tab. 12, and the Cross-scale imbalance setting results are summarized in Tab. 13.

## 12. Limitations

HYCAL is designed for settings in which frozen pre-trained representations are already sufficiently informative and where prototype-level calibration is preferable to backbone adaptation. Accordingly, its effectiveness depends on the quality of the underlying representation space. When newly arriving tasks come from domains that lie far outside the support of the pretrained model, or when image and text embeddings are strongly misaligned, prototype calibration alone may be insufficient to recover fully discriminative structure.

In addition, although the cosine similarity and regularized Mahalanobis term improve stability in few-shot regimes, covariance estimation can still become noisy when only extremely small numbers of samples are available or when class distributions are highly multimodal. Finally, HYCAL deliberately avoids parameter updates in order to preserve efficiency and retention, which is advantageous in data-scarce continual settings, but may limit the attainable gains in scenarios where abundant in-domain data and larger adaptation budgets make trainable methods viable.

Table 9. Performance across random domain orders (I–IV) under the High-scale domain imbalanced setting. Results are averaged over 4 seeds with 95% confidence intervals in subscripts. Domain names are abbreviated.

| <i>Random Order I</i>   |                                  |                                  |                                  |                                  |                                  |                                  |                                  |                                  |                                  |                  |
|-------------------------|----------------------------------|----------------------------------|----------------------------------|----------------------------------|----------------------------------|----------------------------------|----------------------------------|----------------------------------|----------------------------------|------------------|
|                         | Galaxy                           | ArtBench                         | MNIST                            | DTD                              | Aircraft                         | EuroSAT                          | Flower                           | Organ                            | Average                          | $\sigma$         |
| Zero-shot               | 9.80                             | 50.88                            | 44.01                            | 41.90                            | 23.91                            | 37.58                            | 67.40                            | 17.97                            | 56.41                            | 18.76            |
| <b>Average Acc.</b>     |                                  |                                  |                                  |                                  |                                  |                                  |                                  |                                  |                                  |                  |
| Primal-RAIL [35]        | 25.37 $\pm$ 10.57                | 60.23 $\pm$ 0.72                 | 76.99 $\pm$ 6.49                 | 68.93 $\pm$ 1.35                 | 37.45 $\pm$ 1.18                 | 72.42 $\pm$ 1.14                 | 90.49 $\pm$ 0.58                 | 53.83 $\pm$ 3.88                 | 52.60 $\pm$ 3.58                 | 21.47 $\pm$ 2.62 |
| FeCAM [6]               | 2.89 $\pm$ 1.46                  | 5.76 $\pm$ 0.64                  | 0.00 $\pm$ 0.00                  | 31.77 $\pm$ 5.68                 | 11.88 $\pm$ 0.98                 | 0.00 $\pm$ 0.00                  | 1.76 $\pm$ 3.04                  | 0.00 $\pm$ 0.00                  | 8.93 $\pm$ 0.74                  | 10.92 $\pm$ 1.86 |
| RanPAC [22]             | 37.02 $\pm$ 5.25                 | 40.30 $\pm$ 5.96                 | <b>77.63<math>\pm</math>3.51</b> | 66.33 $\pm$ 0.55                 | 35.95 $\pm$ 1.11                 | 71.66 $\pm$ 4.17                 | 92.45 $\pm$ 0.48                 | 56.07 $\pm$ 3.90                 | 51.61 $\pm$ 1.85                 | 20.96 $\pm$ 0.72 |
| KLDA [23]               | 19.98 $\pm$ 0.50                 | 22.89 $\pm$ 2.32                 | 53.28 $\pm$ 3.68                 | 54.83 $\pm$ 1.18                 | 39.53 $\pm$ 1.95                 | <b>76.60<math>\pm</math>2.75</b> | <b>95.74<math>\pm</math>0.50</b> | <b>58.78<math>\pm</math>2.59</b> | 31.03 $\pm$ 0.81                 | 25.65 $\pm$ 0.52 |
| HYCAL(Ours)             | <b>38.32<math>\pm</math>2.02</b> | <b>50.27<math>\pm</math>2.52</b> | 77.42 $\pm$ 5.24                 | <b>69.59<math>\pm</math>0.23</b> | <b>41.67<math>\pm</math>0.34</b> | 76.59 $\pm$ 3.27                 | 95.69 $\pm$ 0.38                 | 58.42 $\pm$ 2.72                 | <b>54.96<math>\pm</math>0.81</b> | 19.87 $\pm$ 0.65 |
| <b>Last Acc.</b>        |                                  |                                  |                                  |                                  |                                  |                                  |                                  |                                  |                                  |                  |
| Primal-RAIL [35]        | 19.90 $\pm$ 8.04                 | 60.32 $\pm$ 0.59                 | 76.76 $\pm$ 6.69                 | 68.03 $\pm$ 1.51                 | 37.23 $\pm$ 1.14                 | 71.89 $\pm$ 1.64                 | 90.46 $\pm$ 0.54                 | 53.83 $\pm$ 3.88                 | 59.80 $\pm$ 1.18                 | 22.69 $\pm$ 2.04 |
| FeCAM [6]               | 0.00 $\pm$ 0.00                  | 0.00 $\pm$ 0.00                  | 0.00 $\pm$ 0.00                  | 31.77 $\pm$ 5.68                 | 11.88 $\pm$ 0.98                 | 0.00 $\pm$ 0.00                  | 1.76 $\pm$ 3.04                  | 0.00 $\pm$ 0.00                  | 5.68 $\pm$ 0.73                  | 11.34 $\pm$ 1.83 |
| RanPAC [22]             | 37.42 $\pm$ 4.29                 | 40.41 $\pm$ 6.27                 | 76.91 $\pm$ 3.83                 | 67.02 $\pm$ 1.02                 | 36.87 $\pm$ 1.04                 | 71.24 $\pm$ 4.36                 | 92.44 $\pm$ 0.49                 | 56.07 $\pm$ 3.90                 | 59.80 $\pm$ 1.68                 | 20.64 $\pm$ 0.71 |
| KLDA [23]               | 36.13 $\pm$ 2.28                 | 37.82 $\pm$ 4.62                 | <b>78.97<math>\pm</math>5.62</b> | <b>69.39<math>\pm</math>1.70</b> | 39.86 $\pm$ 1.98                 | <b>76.74<math>\pm</math>2.68</b> | <b>95.77<math>\pm</math>0.41</b> | <b>58.78<math>\pm</math>2.59</b> | 61.68 $\pm$ 1.24                 | 22.27 $\pm$ 0.89 |
| HYCAL(Ours)             | <b>38.15<math>\pm</math>1.82</b> | <b>49.66<math>\pm</math>2.42</b> | 77.72 $\pm$ 5.20                 | 69.27 $\pm$ 0.43                 | <b>41.67<math>\pm</math>0.36</b> | 76.55 $\pm$ 3.27                 | 95.69 $\pm$ 0.38                 | 58.42 $\pm$ 2.72                 | <b>63.39<math>\pm</math>0.48</b> | 19.98 $\pm$ 0.64 |
| <i>Random Order II</i>  |                                  |                                  |                                  |                                  |                                  |                                  |                                  |                                  |                                  |                  |
|                         | EuroSAT                          | Organ                            | ArtBench                         | MNIST                            | Flower                           | Aircraft                         | Galaxy                           | DTD                              | Average                          | $\sigma$         |
| Zero-shot               | 37.58                            | 17.97                            | 50.88                            | 44.01                            | 67.40                            | 23.91                            | 9.80                             | 41.90                            | 56.41                            | 18.76            |
| <b>Average Acc.</b>     |                                  |                                  |                                  |                                  |                                  |                                  |                                  |                                  |                                  |                  |
| Primal-RAIL [35]        | 72.84 $\pm$ 3.93                 | 54.25 $\pm$ 3.81                 | 60.03 $\pm$ 0.66                 | 77.83 $\pm$ 6.33                 | 91.75 $\pm$ 0.58                 | 37.86 $\pm$ 0.67                 | 22.22 $\pm$ 10.58                | 67.77 $\pm$ 1.44                 | 65.78 $\pm$ 0.87                 | 22.48 $\pm$ 2.61 |
| FeCAM [6]               | 3.24 $\pm$ 1.05                  | 2.67 $\pm$ 1.31                  | 4.71 $\pm$ 1.08                  | 0.00 $\pm$ 0.00                  | 23.22 $\pm$ 7.27                 | 12.44 $\pm$ 1.70                 | 0.00 $\pm$ 0.00                  | 31.24 $\pm$ 8.07                 | 7.90 $\pm$ 0.25                  | 11.80 $\pm$ 2.76 |
| RanPAC [22]             | 72.90 $\pm$ 3.17                 | 56.52 $\pm$ 3.40                 | 45.90 $\pm$ 3.80                 | <b>80.32<math>\pm</math>6.70</b> | 91.77 $\pm$ 1.33                 | 36.54 $\pm$ 0.14                 | <b>39.21<math>\pm</math>4.30</b> | 67.32 $\pm$ 1.28                 | 65.28 $\pm$ 1.53                 | 20.14 $\pm$ 2.11 |
| KLDA [23]               | 39.06 $\pm$ 1.55                 | 33.26 $\pm$ 1.15                 | 27.34 $\pm$ 1.10                 | 64.01 $\pm$ 2.90                 | 90.94 $\pm$ 0.28                 | 38.64 $\pm$ 1.43                 | 33.27 $\pm$ 7.29                 | 68.63 $\pm$ 0.92                 | 32.89 $\pm$ 0.74                 | 22.53 $\pm$ 1.25 |
| HYCAL(Ours)             | <b>73.33<math>\pm</math>3.32</b> | <b>56.56<math>\pm</math>3.97</b> | <b>51.28<math>\pm</math>2.75</b> | 76.76 $\pm$ 5.23                 | <b>95.76<math>\pm</math>0.51</b> | <b>41.01<math>\pm</math>0.76</b> | 38.67 $\pm$ 5.34                 | <b>69.41<math>\pm</math>1.01</b> | <b>65.71<math>\pm</math>1.17</b> | 19.59 $\pm$ 1.13 |
| <b>Last Acc.</b>        |                                  |                                  |                                  |                                  |                                  |                                  |                                  |                                  |                                  |                  |
| Primal-RAIL [35]        | 68.99 $\pm$ 5.05                 | 51.98 $\pm$ 3.55                 | 59.91 $\pm$ 0.75                 | 77.36 $\pm$ 6.73                 | 90.42 $\pm$ 0.72                 | 37.50 $\pm$ 0.73                 | 20.28 $\pm$ 9.73                 | 67.77 $\pm$ 1.44                 | 59.28 $\pm$ 1.57                 | 22.50 $\pm$ 2.69 |
| FeCAM [6]               | 0.00 $\pm$ 0.00                  | 0.00 $\pm$ 0.00                  | 0.00 $\pm$ 0.00                  | 0.00 $\pm$ 0.00                  | 1.12 $\pm$ 3.21                  | 11.90 $\pm$ 1.72                 | 0.00 $\pm$ 0.00                  | 31.24 $\pm$ 8.07                 | 5.53 $\pm$ 1.31                  | 11.21 $\pm$ 2.58 |
| RanPAC [22]             | 70.02 $\pm$ 4.13                 | 54.34 $\pm$ 3.54                 | 41.03 $\pm$ 3.95                 | 77.57 $\pm$ 7.28                 | 91.90 $\pm$ 1.03                 | 37.08 $\pm$ 0.81                 | <b>39.08<math>\pm</math>4.09</b> | 67.32 $\pm$ 1.28                 | 59.79 $\pm$ 1.38                 | 20.20 $\pm$ 1.99 |
| KLDA [23]               | <b>75.43<math>\pm</math>3.99</b> | 57.80 $\pm$ 2.93                 | 37.35 $\pm$ 2.72                 | <b>78.22<math>\pm</math>4.61</b> | 95.33 $\pm$ 0.58                 | 39.15 $\pm$ 1.15                 | 33.44 $\pm$ 7.53                 | 68.63 $\pm$ 0.92                 | 60.67 $\pm$ 1.13                 | 22.59 $\pm$ 1.50 |
| HYCAL(Ours)             | 74.01 $\pm$ 3.21                 | <b>58.46<math>\pm</math>4.30</b> | <b>49.65<math>\pm</math>2.44</b> | 77.69 $\pm$ 5.15                 | <b>95.71<math>\pm</math>0.53</b> | <b>40.95<math>\pm</math>0.74</b> | 38.18 $\pm$ 5.02                 | <b>69.41<math>\pm</math>1.01</b> | <b>63.01<math>\pm</math>1.08</b> | 19.89 $\pm$ 1.11 |
| <i>Random Order III</i> |                                  |                                  |                                  |                                  |                                  |                                  |                                  |                                  |                                  |                  |
|                         | EuroSAT                          | Galaxy                           | Organ                            | Flower                           | DTD                              | MNIST                            | Aircraft                         | ArtBench                         | Average                          | $\sigma$         |
| Zero-shot               | 37.58                            | 9.80                             | 17.97                            | 67.40                            | 41.90                            | 44.01                            | 23.91                            | 50.88                            | 56.41                            | 18.76            |
| <b>Average Acc.</b>     |                                  |                                  |                                  |                                  |                                  |                                  |                                  |                                  |                                  |                  |
| Primal-RAIL [35]        | 72.40 $\pm$ 4.22                 | 25.96 $\pm$ 2.91                 | 54.38 $\pm$ 1.74                 | 91.44 $\pm$ 0.46                 | 68.09 $\pm$ 1.01                 | 80.68 $\pm$ 3.75                 | 37.02 $\pm$ 0.93                 | 59.24 $\pm$ 1.67                 | 61.48 $\pm$ 1.27                 | 21.89 $\pm$ 0.96 |
| FeCAM [6]               | 5.44 $\pm$ 1.07                  | 4.53 $\pm$ 0.67                  | 3.20 $\pm$ 2.38                  | 6.24 $\pm$ 1.93                  | 35.83 $\pm$ 9.74                 | 0.00 $\pm$ 0.00                  | 11.60 $\pm$ 2.93                 | 0.00 $\pm$ 0.00                  | 10.15 $\pm$ 1.25                 | 11.76 $\pm$ 3.11 |
| RanPAC [22]             | 72.72 $\pm$ 1.99                 | <b>39.72<math>\pm</math>3.65</b> | 56.02 $\pm$ 3.30                 | 91.60 $\pm$ 0.42                 | 65.82 $\pm$ 0.36                 | 78.17 $\pm$ 4.58                 | 35.60 $\pm$ 0.78                 | 39.72 $\pm$ 2.28                 | 63.91 $\pm$ 1.21                 | 20.60 $\pm$ 0.55 |
| KLDA                    | 46.86 $\pm$ 1.94                 | 23.35 $\pm$ 1.93                 | 46.52 $\pm$ 3.05                 | 86.14 $\pm$ 2.78                 | 67.35 $\pm$ 1.40                 | <b>81.35<math>\pm</math>2.06</b> | 39.46 $\pm$ 0.66                 | 37.17 $\pm$ 2.54                 | 39.60 $\pm$ 1.12                 | 22.38 $\pm$ 0.93 |
| HYCAL(Ours)             | <b>73.81<math>\pm</math>3.36</b> | 38.20 $\pm$ 5.59                 | <b>58.84<math>\pm</math>1.22</b> | <b>95.64<math>\pm</math>0.65</b> | <b>69.54<math>\pm</math>0.60</b> | 79.06 $\pm$ 3.41                 | <b>41.43<math>\pm</math>1.16</b> | <b>48.51<math>\pm</math>1.85</b> | <b>64.73<math>\pm</math>1.70</b> | 20.00 $\pm$ 1.69 |
| <b>Last Acc.</b>        |                                  |                                  |                                  |                                  |                                  |                                  |                                  |                                  |                                  |                  |
| Primal-RAIL [35]        | 69.10 $\pm$ 5.00                 | 19.83 $\pm$ 2.46                 | 53.43 $\pm$ 1.22                 | 90.40 $\pm$ 0.49                 | 67.51 $\pm$ 0.90                 | 80.49 $\pm$ 3.89                 | 36.97 $\pm$ 0.94                 | 59.24 $\pm$ 1.67                 | 59.62 $\pm$ 0.55                 | 22.94 $\pm$ 1.03 |
| FeCAM [6]               | 0.00 $\pm$ 0.00                  | 0.00 $\pm$ 0.00                  | 0.00 $\pm$ 0.00                  | 0.57 $\pm$ 0.51                  | 35.83 $\pm$ 9.74                 | 0.00 $\pm$ 0.00                  | 11.60 $\pm$ 2.93                 | 0.00 $\pm$ 0.00                  | 6.00 $\pm$ 1.11                  | 12.75 $\pm$ 3.18 |
| RanPAC [22]             | 70.36 $\pm$ 4.04                 | <b>39.95<math>\pm</math>4.09</b> | 55.10 $\pm$ 3.53                 | 91.92 $\pm$ 0.68                 | 66.92 $\pm$ 0.68                 | 77.37 $\pm$ 5.98                 | 36.84 $\pm$ 1.31                 | 39.72 $\pm$ 2.28                 | 59.77 $\pm$ 1.51                 | 20.24 $\pm$ 1.12 |
| KLDA                    | <b>75.57<math>\pm</math>4.02</b> | 35.46 $\pm$ 3.58                 | 57.51 $\pm$ 3.50                 | 95.10 $\pm$ 1.51                 | 68.11 $\pm$ 1.35                 | <b>80.69<math>\pm</math>2.11</b> | 39.44 $\pm$ 0.81                 | 37.17 $\pm$ 2.54                 | 61.13 $\pm$ 0.52                 | 22.44 $\pm$ 0.80 |
| HYCAL(Ours)             | 74.01 $\pm$ 3.22                 | 38.09 $\pm$ 5.88                 | <b>58.81<math>\pm</math>1.27</b> | <b>95.62<math>\pm</math>0.64</b> | <b>69.65<math>\pm</math>0.65</b> | 79.07 $\pm$ 3.42                 | <b>41.44<math>\pm</math>1.16</b> | <b>48.51<math>\pm</math>1.85</b> | <b>63.15<math>\pm</math>0.74</b> | 20.04 $\pm$ 1.76 |
| <i>Random order IV</i>  |                                  |                                  |                                  |                                  |                                  |                                  |                                  |                                  |                                  |                  |
|                         | ArtBench                         | MNIST                            | Organ                            | Aircraft                         | EuroSAT                          | DTD                              | Galaxy                           | Flower                           | Average                          | $\sigma$         |
| Zero-shot               | 50.88                            | 44.01                            | 17.97                            | 23.91                            | 37.58                            | 41.90                            | 9.80                             | 67.40                            | 56.41                            | 18.76            |
| <b>Average Acc.</b>     |                                  |                                  |                                  |                                  |                                  |                                  |                                  |                                  |                                  |                  |
| Primal-RAIL             | 60.55 $\pm$ 0.19                 | 77.25 $\pm$ 5.23                 | 55.28 $\pm$ 5.19                 | 37.01 $\pm$ 0.37                 | 74.29 $\pm$ 7.47                 | 68.54 $\pm$ 0.96                 | 24.15 $\pm$ 8.06                 | 90.49 $\pm$ 0.32                 | 61.58 $\pm$ 0.48                 | 21.96 $\pm$ 1.96 |
| FeCAM                   | 0.00 $\pm$ 0.00                  | 0.00 $\pm$ 0.00                  | 0.00 $\pm$ 0.00                  | 11.93 $\pm$ 0.00                 | 0.00 $\pm$ 0.00                  | 33.17 $\pm$ 3.67                 | 0.00 $\pm$ 0.00                  | 0.14 $\pm$ 0.20                  | 5.66 $\pm$ 0.40                  | 11.89 $\pm$ 1.12 |
| RanPAC                  | 39.93 $\pm$ 4.15                 | <b>79.06<math>\pm</math>7.55</b> | 56.45 $\pm$ 6.11                 | <b>36.22<math>\pm</math>2.13</b> | 71.24 $\pm$ 3.93                 | 67.45 $\pm$ 1.89                 | <b>39.71<math>\pm</math>0.89</b> | 92.43 $\pm$ 0.80                 | 56.08 $\pm$ 2.20                 | 20.77 $\pm$ 1.02 |
| KLDA [23]               | 21.56 $\pm$ 1.54                 | 49.22 $\pm$ 5.31                 | 40.30 $\pm$ 2.21                 | 27.68 $\pm$ 0.45                 | 70.05 $\pm$ 4.84                 | 68.01 $\pm$ 1.04                 | 36.23 $\pm$ 5.53                 | 95.26 $\pm$ 1.04                 | 31.44 $\pm$ 1.53                 | 25.01 $\pm$ 1.09 |
| HYCAL (Ours)            | <b>50.94<math>\pm</math>2.66</b> | 76.84 $\pm$ 5.18                 | <b>58.46<math>\pm</math>3.45</b> | <b>41.21<math>\pm</math>0.81</b> | <b>72.29<math>\pm</math>4.85</b> | <b>69.56<math>\pm</math>1.24</b> | 39.35 $\pm$ 4.00                 | <b>95.62<math>\pm</math>0.41</b> | <b>59.69<math>\pm</math>1.70</b> | 19.29 $\pm$ 1.31 |
| <b>Last Acc.</b>        |                                  |                                  |                                  |                                  |                                  |                                  |                                  |                                  |                                  |                  |
| Primal-RAIL             | 60.55 $\pm$ 0.08                 | 76.69 $\pm$ 5.99                 | 54.19 $\pm$ 4.98                 | 36.60 $\pm$ 0.56                 | 73.05 $\pm$ 7.54                 | 67.75 $\pm$ 0.94                 | 22.90 $\pm$ 7.91                 | 90.49 $\pm$ 0.32                 | 60.28 $\pm$ 0.61                 | 22.17 $\pm$ 1.98 |
| FeCAM                   | 8.56 $\pm$ 4.51                  | 0.00 $\pm$ 0.00                  | 0.95 $\pm$ 1.74                  | 12.31 $\pm$ 2.19                 | 0.00 $\pm$ 0.00                  | 33.19 $\pm$ 3.67                 | 0.00 $\pm$ 0.00                  | 0.14 $\pm$ 0.20                  | 8.64 $\pm$ 3.29                  | 11.67 $\pm$ 1.08 |
| RanPAC                  | 38.00 $\pm$ 2.78                 | 78.88 $\pm$ 7.08                 | 57.08 $\pm$ 3.78                 | 37.43 $\pm$ 1.28                 | 72.07 $\pm$ 5.04                 | 67.26 $\pm$ 1.38                 | <b>39.35<math>\pm</math>1.31</b> | 92.43 $\pm$ 0.80                 | 60.31 $\pm$ 0.63                 | 20.91 $\pm$ 0.94 |
| KLDA [23]               | 37.59 $\pm$ 4.24                 | <b>79.63<math>\pm</math>4.88</b> | 58.08 $\pm$ 2.55                 | 39.58 $\pm$ 0.75                 | <b>72.63<math>\pm</math>6.17</b> | 68.79 $\pm$ 0.94                 | 36.33 $\pm$ 5.01                 | 95.26 $\pm$ 1.04                 | 60.99 $\pm$ 0.68                 | 21.94 $\pm$ 1.24 |
| HYCAL (Ours)            | <b>49.42<math>\pm</math>2.29</b> | 77.68 $\pm$ 5.13                 | <b>59.06<math>\pm</math>2.58</b> | <b>41.25<math>\pm</math>0.85</b> | 72.40 $\pm$ 4.78                 | <b>69.47<math>\pm</math>1.25</b> | 39.30 $\pm$ 3.83                 | <b>95.62<math>\pm</math>0.41</b> | <b>63.03<math>\pm</math>1.11</b> | 19.50 $\pm$ 1.27 |

Table 10. Per-class sample counts ( $K_c$ ) for the XD-VSCIL setting on the Aircraft, ArtBench, DTD, and EuroSAT datasets, with `random_seed=42`. Classes are sorted alphabetically.

| Aircraft (aeronautics) [19] |       |              |       |                    |       |                     |       |
|-----------------------------|-------|--------------|-------|--------------------|-------|---------------------|-------|
| Class Name                  | $K_c$ | Class Name   | $K_c$ | Class Name         | $K_c$ | Class Name          | $K_c$ |
| 707-320                     | 45    | 727-200      | 12    | 737-200            | 6     | 737-300             | 22    |
| 737-400                     | 20    | 737-500      | 19    | 737-600            | 13    | 737-700             | 11    |
| 737-800                     | 48    | 737-900      | 39    | 747-100            | 10    | 747-200             | 42    |
| 747-300                     | 32    | 747-400      | 7     | 757-200            | 6     | 757-300             | 10    |
| 767-200                     | 18    | 767-300      | 19    | 767-400            | 37    | 777-200             | 43    |
| 777-300                     | 6     | A300B4       | 40    | A310               | 17    | A318                | 50    |
| A319                        | 46    | A320         | 49    | A321               | 39    | A330-200            | 31    |
| A330-300                    | 19    | A340-200     | 33    | A340-300           | 42    | A340-500            | 22    |
| A340-600                    | 5     | A380         | 15    | ATR-42             | 49    | ATR-72              | 32    |
| An-12                       | 26    | BAE 146-200  | 22    | BAE 146-300        | 14    | BAE-125             | 18    |
| Beechcraft 1900             | 26    | Boeing 717   | 11    | C-130              | 10    | C-47                | 29    |
| CRJ-200                     | 11    | CRJ-700      | 27    | CRJ-900            | 27    | Cessna 172          | 43    |
| Cessna 208                  | 21    | Cessna 525   | 7     | Cessna 560         | 34    | Challenger 600      | 39    |
| DC-10                       | 12    | DC-3         | 29    | DC-6               | 10    | DC-8                | 40    |
| DC-9-30                     | 23    | DH-82        | 45    | DHC-1              | 44    | DHC-6               | 28    |
| DHC-8-100                   | 41    | DHC-8-300    | 17    | DR-400             | 50    | Dornier 328         | 9     |
| E-170                       | 7     | E-190        | 47    | E-195              | 19    | EMB-120             | 23    |
| ERJ 135                     | 10    | ERJ 145      | 19    | Embraer Legacy 600 | 11    | Eurofighter Typhoon | 29    |
| F-16A/B                     | 22    | F/A-18       | 34    | Falcon 2000        | 45    | Falcon 900          | 28    |
| Fokker 100                  | 15    | Fokker 50    | 28    | Fokker 70          | 27    | Global Express      | 18    |
| Gulfstream IV               | 47    | Gulfstream V | 22    | Hawk T1            | 49    | Il-76               | 48    |
| L-1011                      | 46    | MD-11        | 9     | MD-80              | 43    | MD-87               | 45    |
| MD-90                       | 15    | Metroliner   | 39    | Model B200         | 20    | PA-28               | 15    |
| SR-20                       | 34    | Saab 2000    | 29    | Saab 340           | 22    | Spitfire            | 45    |
| Tornado                     | 49    | Tu-134       | 40    | Tu-154             | 19    | Yak-42              | 48    |

  

| ArtBench (art) [17] |       |                    |       |             |       |            |       |
|---------------------|-------|--------------------|-------|-------------|-------|------------|-------|
| Class Name          | $K_c$ | Class Name         | $K_c$ | Class Name  | $K_c$ | Class Name | $K_c$ |
| Art Nouveau         | 46    | Impressionism      | 13    | Renaissance | 50    | Ukiyo-e    | 48    |
| Baroque             | 13    | Post-impressionism | 20    | Romanticism | 25    |            |       |
| Expressionism       | 49    | Realism            | 14    | Surrealism  | 20    |            |       |

  

| DTD (textures) [3] |       |             |       |              |       |            |       |
|--------------------|-------|-------------|-------|--------------|-------|------------|-------|
| Class Name         | $K_c$ | Class Name  | $K_c$ | Class Name   | $K_c$ | Class Name | $K_c$ |
| banded             | 30    | flecked     | 10    | matted       | 34    | sprinkled  | 22    |
| blotchy            | 36    | freckled    | 30    | meshed       | 45    | stained    | 25    |
| braided            | 14    | frilly      | 37    | paisley      | 47    | stratified | 23    |
| bubbly             | 41    | gauzy       | 22    | perforated   | 49    | striped    | 26    |
| bumpy              | 45    | grid        | 49    | pitted       | 27    | studded    | 40    |
| chequered          | 22    | grooved     | 28    | pleated      | 9     | swirly     | 41    |
| cobwebbed          | 45    | honeycombed | 34    | polka-dotted | 39    | veined     | 13    |
| cracked            | 31    | interlaced  | 36    | porous       | 30    | waffled    | 41    |
| crosshatched       | 29    | knitted     | 25    | potholed     | 18    | woven      | 36    |
| crystalline        | 33    | lacelike    | 42    | scaly        | 32    | wrinkled   | 26    |
| dotted             | 9     | lined       | 5     | smearred     | 18    | zigzagged  | 48    |
| fibrous            | 45    | marbled     | 10    | spiralled    | 36    |            |       |

  

| EuroSAT (remote sensing) [9] |       |                      |       |                       |       |             |       |
|------------------------------|-------|----------------------|-------|-----------------------|-------|-------------|-------|
| Class Name                   | $K_c$ | Class Name           | $K_c$ | Class Name            | $K_c$ | Class Name  | $K_c$ |
| Annual Crop Land             | 26    | Highway or Road      | 19    | Permanent Crop Land   | 40    | Sea or Lake | 35    |
| Forest                       | 28    | Industrial Buildings | 34    | Residential Buildings | 44    |             |       |
| Herbaceous Vegetation Land   | 8     | Pasture Land         | 26    | River                 | 43    |             |       |

Table 11. Per-class sample counts ( $K_c$ ) for the XD-VSCIL setting on the Galaxy, MNIST, OrganMNIST, and OxfordFlowers, with `random_seed=42`. Classes are sorted alphabetically.

| <b>Galaxy (astronomy) [13]</b>                   |       |                                  |       |                                |       |                             |       |
|--------------------------------------------------|-------|----------------------------------|-------|--------------------------------|-------|-----------------------------|-------|
| Class Name                                       | $K_c$ | Class Name                       | $K_c$ | Class Name                     | $K_c$ | Class Name                  | $K_c$ |
| Disturbed Galaxies                               | 7     | In-between Round Smooth Galaxies | 27    | Unbarred Tight Spiral Galaxies | 23    | Edge-on Galaxies with Bulge | 43    |
| Merging Galaxies                                 | 49    | Cigar Shaped Smooth Galaxies     | 37    | Unbarred Loose Spiral Galaxies | 48    |                             |       |
| Round Smooth Galaxies                            | 9     | Barred Spiral Galaxies           | 11    | Edge-on Galaxies without Bulge | 24    |                             |       |
| <b>MNIST(fundamental visual perception) [4]</b>  |       |                                  |       |                                |       |                             |       |
| Class Name                                       | $K_c$ | Class Name                       | $K_c$ | Class Name                     | $K_c$ | Class Name                  | $K_c$ |
| 0                                                | 9     | 3                                | 29    | 6                              | 6     | 9                           | 37    |
| 1                                                | 19    | 4                                | 13    | 7                              | 17    |                             |       |
| 2                                                | 29    | 5                                | 11    | 8                              | 38    |                             |       |
| <b>OrganMNIST (medical imaging) [36]</b>         |       |                                  |       |                                |       |                             |       |
| Class Name                                       | $K_c$ | Class Name                       | $K_c$ | Class Name                     | $K_c$ | Class Name                  | $K_c$ |
| liver                                            | 48    | pancreas                         | 43    | bladder                        | 35    | right femur                 | 7     |
| right lung                                       | 31    | left lung                        | 11    | spleen                         | 44    | left femur                  | 39    |
| right kidney                                     | 14    | left kidney                      | 16    | heart                          | 43    |                             |       |
| <b>OxfordFlowers (fine-grained biology) [24]</b> |       |                                  |       |                                |       |                             |       |
| Class Name                                       | $K_c$ | Class Name                       | $K_c$ | Class Name                     | $K_c$ | Class Name                  | $K_c$ |
| passion flower                                   | 42    | fritillary                       | 16    | sunflower                      | 24    | pink primrose               | 12    |
| water lily                                       | 11    | sweet william                    | 41    | magnolia                       | 21    | fire lily                   | 27    |
| cyclamen                                         | 25    | azalea                           | 13    | osteospermum                   | 40    | red ginger                  | 48    |
| watercress                                       | 28    | primula                          | 41    | garden phlox                   | 41    | prince of wales feathers    | 43    |
| frangipani                                       | 44    | cape flower                      | 48    | sweet pea                      | 8     | carnation                   | 17    |
| wallflower                                       | 21    | purple coneflower                | 19    | daffodil                       | 30    | mexican aster               | 41    |
| rose                                             | 16    | colt's foot                      | 11    | king protea                    | 11    | alpine sea holly            | 41    |
| petunia                                          | 40    | artichoke                        | 22    | great masterwort               | 49    | siam tulip                  | 46    |
| poinsettia                                       | 21    | wild pansy                       | 20    | black-eyed susan               | 15    | spring crocus               | 46    |
| clematis                                         | 20    | peruvian lily                    | 40    | bearded iris                   | 8     | globe thistle               | 39    |
| hibiscus                                         | 22    | ruby-lipped cattleya             | 32    | windflower                     | 18    | bolero deep blue            | 16    |
| lotus                                            | 35    | canna lily                       | 29    | ball moss                      | 21    | tiger lily                  | 23    |
| anthurium                                        | 44    | gazania                          | 17    | spear thistle                  | 35    | moon orchid                 | 27    |
| thorn apple                                      | 26    | lenten rose                      | 14    | silverbush                     | 45    | gaura                       | 25    |
| barbeton daisy                                   | 28    | buttercup                        | 14    | balloon flower                 | 11    | japanese anemone            | 48    |
| sword lily                                       | 16    | pelargonium                      | 35    | oxeye daisy                    | 33    | foxglove                    | 37    |
| morning glory                                    | 36    | desert-rose                      | 5     | cautleya spicata               | 26    | bougainvillea               | 36    |
| columbine                                        | 32    | hippeastrum                      | 16    | common dandelion               | 21    | camellia                    | 33    |
| geranium                                         | 18    | giant white arum lily            | 31    | yellow iris                    | 28    | mallow                      | 10    |
| bishop of llandaff                               | 31    | marigold                         | 36    | monkshood                      | 28    | mexican petunia             | 29    |
| tree mallow                                      | 49    | orange dahlia                    | 13    | love in the mist               | 40    | bromelia                    | 44    |
| pink-yellow dahlia                               | 28    | hard-leaved pocket orchid        | 45    | corn poppy                     | 40    | blanket flower              | 23    |
| bee balm                                         | 28    | english marigold                 | 38    | grape hyacinth                 | 21    | trumpet creeper             | 34    |
| snapdragon                                       | 30    | stemless gentian                 | 39    | canterbury bells               | 27    | blackberry lily             | 45    |
| californian poppy                                | 22    | tree poppy                       | 25    | globe-flower                   | 6     |                             |       |
| bird of paradise                                 | 33    | pincushion flower                | 36    | toad lily                      | 31    |                             |       |

Table 12. Performance under Balanced-in-class domain setting. Average and Last accuracy (%) across 8 domains. Results are averaged over 4 seeds with 95% confidence intervals in subscripts. Domain names are abbreviated.

| Balanced-in-Class Domain |                                  |                                  |                                  |                  |                  |                                  |                                  |                                  |                                  |                  |
|--------------------------|----------------------------------|----------------------------------|----------------------------------|------------------|------------------|----------------------------------|----------------------------------|----------------------------------|----------------------------------|------------------|
|                          | Aircraft                         | ArtBench                         | DTD                              | EuroSAT          | Galaxy           | MNIST                            | Organ                            | Flower                           | Average                          | $\sigma$         |
| Zero-shot                | 23.91                            | 50.88                            | 41.90                            | 37.58            | 9.80             | 44.01                            | 17.97                            | 67.40                            | 56.41                            | 18.76            |
| <b>Average Acc.</b>      |                                  |                                  |                                  |                  |                  |                                  |                                  |                                  |                                  |                  |
| Primal-RAIL [35]         | 32.64 $\pm$ 0.88                 | 60.60 $\pm$ 0.67                 | 64.54 $\pm$ 0.68                 | 88.16 $\pm$ 0.73 | 51.55 $\pm$ 1.93 | 91.58 $\pm$ 0.70                 | 67.94 $\pm$ 2.90                 | 86.85 $\pm$ 0.56                 | 56.57 $\pm$ 0.55                 | 20.38 $\pm$ 0.46 |
| FeCAM [6]                | 3.94 $\pm$ 0.67                  | 40.69 $\pm$ 2.23                 | 3.60 $\pm$ 2.67                  | 17.51 $\pm$ 9.16 | 17.46 $\pm$ 7.04 | 0.47 $\pm$ 1.14                  | 9.72 $\pm$ 10.18                 | 0.00 $\pm$ 0.00                  | 14.88 $\pm$ 1.39                 | 13.96 $\pm$ 0.63 |
| RanPAC [22]              | 30.18 $\pm$ 1.99                 | 58.88 $\pm$ 1.22                 | 59.20 $\pm$ 2.93                 | 87.26 $\pm$ 1.57 | 57.60 $\pm$ 1.11 | 93.85 $\pm$ 0.82                 | 72.28 $\pm$ 1.90                 | 87.26 $\pm$ 1.14                 | 55.60 $\pm$ 1.10                 | 21.15 $\pm$ 0.81 |
| KLDA [23]                | 24.63 $\pm$ 0.50                 | 50.53 $\pm$ 0.54                 | 60.76 $\pm$ 1.23                 | 90.44 $\pm$ 0.53 | 55.85 $\pm$ 2.74 | 95.04 $\pm$ 0.66                 | 74.94 $\pm$ 1.07                 | 92.85 $\pm$ 0.53                 | 46.57 $\pm$ 0.62                 | 24.75 $\pm$ 0.38 |
| HYCAL(Ours)              | <b>34.74<math>\pm</math>1.69</b> | <b>60.41<math>\pm</math>0.59</b> | <b>64.54<math>\pm</math>1.03</b> | 89.25 $\pm$ 0.24 | 51.65 $\pm$ 1.80 | <b>95.14<math>\pm</math>0.49</b> | <b>76.36<math>\pm</math>1.14</b> | <b>93.07<math>\pm</math>0.75</b> | <b>57.75<math>\pm</math>0.45</b> | 21.63 $\pm$ 0.57 |
| <b>Last Acc.</b>         |                                  |                                  |                                  |                  |                  |                                  |                                  |                                  |                                  |                  |
| Primal-RAIL [35]         | 31.77 $\pm$ 0.54                 | 60.67 $\pm$ 0.56                 | 62.56 $\pm$ 0.97                 | 87.89 $\pm$ 0.80 | 50.70 $\pm$ 2.29 | 91.32 $\pm$ 0.83                 | 67.73 $\pm$ 2.91                 | 86.85 $\pm$ 0.56                 | 67.44 $\pm$ 0.68                 | 20.67 $\pm$ 0.44 |
| FeCAM [6]                | 3.05 $\pm$ 0.93                  | 40.69 $\pm$ 2.23                 | 3.60 $\pm$ 2.67                  | 17.51 $\pm$ 9.16 | 17.46 $\pm$ 7.04 | 0.47 $\pm$ 1.14                  | 9.72 $\pm$ 10.18                 | 0.00 $\pm$ 0.00                  | 11.56 $\pm$ 1.94                 | 14.04 $\pm$ 0.62 |
| RanPAC [22]              | 29.03 $\pm$ 1.88                 | 52.14 $\pm$ 24.34                | 58.27 $\pm$ 2.60                 | 86.05 $\pm$ 2.59 | 56.75 $\pm$ 1.44 | 92.83 $\pm$ 1.67                 | 70.92 $\pm$ 3.06                 | 87.26 $\pm$ 1.14                 | 67.64 $\pm$ 0.62                 | 22.16 $\pm$ 3.21 |
| KLDA [23]                | 33.40 $\pm$ 1.00                 | 61.49 $\pm$ 0.62                 | 62.34 $\pm$ 1.56                 | 90.13 $\pm$ 0.36 | 55.69 $\pm$ 2.79 | 94.78 $\pm$ 0.64                 | 74.66 $\pm$ 1.17                 | 92.85 $\pm$ 0.53                 | 70.67 $\pm$ 0.90                 | 21.50 $\pm$ 0.57 |
| HYCAL(Ours)              | <b>34.77<math>\pm</math>1.72</b> | 60.70 $\pm$ 0.41                 | <b>63.67<math>\pm</math>1.21</b> | 89.22 $\pm$ 0.24 | 51.34 $\pm$ 1.59 | <b>95.16<math>\pm</math>0.47</b> | <b>76.41<math>\pm</math>1.11</b> | <b>93.07<math>\pm</math>0.75</b> | 70.54 $\pm$ 0.23                 | 21.68 $\pm$ 0.55 |

Table 13. Performance under Cross-scale imbalance setting. Average and Last accuracy (%) across 8 domains. Results are averaged over 4 seeds with 95% confidence intervals in subscripts. Domain names are abbreviated.

| Cross-Scale Imbalance |                                  |                   |                                  |                   |                                  |                                  |                                  |                  |                                  |                  |
|-----------------------|----------------------------------|-------------------|----------------------------------|-------------------|----------------------------------|----------------------------------|----------------------------------|------------------|----------------------------------|------------------|
|                       | Aircraft                         | ArtBench          | DTD                              | EuroSAT           | Galaxy                           | MNIST                            | Organ                            | Flower           | Average                          | $\sigma$         |
| Zero-shot             | 23.91                            | 50.88             | 41.90                            | 37.58             | 9.80                             | 44.01                            | 17.97                            | 67.40            | 56.41                            | 18.76            |
| <b>Average Acc.</b>   |                                  |                   |                                  |                   |                                  |                                  |                                  |                  |                                  |                  |
| Primal-RAIL           | 36.72 $\pm$ 1.63                 | 59.77 $\pm$ 1.10  | 65.60 $\pm$ 2.81                 | 76.42 $\pm$ 3.42  | 36.49 $\pm$ 8.47                 | 57.61 $\pm$ 2.17                 | 53.59 $\pm$ 3.54                 | 87.71 $\pm$ 3.18 | 53.12 $\pm$ 0.71                 | 17.85 $\pm$ 2.14 |
| FeCAM                 | 7.84 $\pm$ 5.90                  | 29.20 $\pm$ 9.53  | 20.46 $\pm$ 2.70                 | 35.55 $\pm$ 9.63  | 15.42 $\pm$ 14.00                | 12.99 $\pm$ 17.42                | 18.38 $\pm$ 25.53                | 8.13 $\pm$ 4.92  | 19.14 $\pm$ 4.82                 | 11.92 $\pm$ 2.54 |
| RanPAC                | 37.75 $\pm$ 3.73                 | 51.65 $\pm$ 2.78  | 63.09 $\pm$ 5.28                 | 76.03 $\pm$ 6.98  | 45.11 $\pm$ 5.95                 | 78.20 $\pm$ 12.34                | 64.02 $\pm$ 7.98                 | 87.30 $\pm$ 7.11 | 53.43 $\pm$ 3.94                 | 17.40 $\pm$ 2.76 |
| KLDA                  | 43.11 $\pm$ 0.85                 | 55.68 $\pm$ 1.12  | 66.66 $\pm$ 3.95                 | 85.61 $\pm$ 1.82  | 48.36 $\pm$ 5.27                 | 89.17 $\pm$ 2.10                 | 70.04 $\pm$ 1.51                 | 96.11 $\pm$ 0.65 | 58.60 $\pm$ 0.59                 | 19.68 $\pm$ 0.69 |
| HYCAL(Ours)           | <b>44.72<math>\pm</math>1.91</b> | 54.09 $\pm$ 1.67  | <b>66.73<math>\pm</math>2.16</b> | 82.30 $\pm$ 2.05  | <b>48.84<math>\pm</math>2.90</b> | <b>89.72<math>\pm</math>0.81</b> | <b>70.83<math>\pm</math>3.35</b> | 95.56 $\pm$ 0.68 | <b>58.71<math>\pm</math>0.99</b> | 19.07 $\pm$ 0.70 |
| <b>Last Acc.</b>      |                                  |                   |                                  |                   |                                  |                                  |                                  |                  |                                  |                  |
| Primal-RAIL           | 35.78 $\pm$ 1.89                 | 59.68 $\pm$ 1.08  | 63.80 $\pm$ 2.79                 | 75.47 $\pm$ 3.44  | 35.47 $\pm$ 9.42                 | 56.32 $\pm$ 2.15                 | 52.95 $\pm$ 3.64                 | 87.71 $\pm$ 3.18 | 58.40 $\pm$ 0.86                 | 18.06 $\pm$ 2.21 |
| FeCAM                 | 6.32 $\pm$ 5.01                  | 26.79 $\pm$ 10.63 | 19.28 $\pm$ 2.80                 | 35.37 $\pm$ 10.16 | 15.40 $\pm$ 13.96                | 12.99 $\pm$ 17.42                | 18.38 $\pm$ 25.53                | 8.13 $\pm$ 4.92  | 17.83 $\pm$ 5.73                 | 11.79 $\pm$ 2.92 |
| RanPAC                | 36.98 $\pm$ 4.30                 | 51.41 $\pm$ 3.23  | 62.19 $\pm$ 5.63                 | 74.71 $\pm$ 7.99  | 44.69 $\pm$ 6.36                 | 75.78 $\pm$ 13.80                | 63.11 $\pm$ 8.14                 | 87.30 $\pm$ 7.11 | 62.02 $\pm$ 5.68                 | 17.23 $\pm$ 2.72 |
| KLDA                  | 43.33 $\pm$ 0.95                 | 56.34 $\pm$ 0.91  | 66.43 $\pm$ 3.75                 | 84.92 $\pm$ 1.94  | 47.66 $\pm$ 5.18                 | 88.54 $\pm$ 2.08                 | 69.52 $\pm$ 1.44                 | 96.11 $\pm$ 0.65 | 69.11 $\pm$ 0.68                 | 19.51 $\pm$ 0.69 |
| HYCAL(Ours)           | <b>44.79<math>\pm</math>1.73</b> | 54.00 $\pm$ 1.91  | 65.91 $\pm$ 1.99                 | 82.27 $\pm$ 2.04  | <b>47.66<math>\pm</math>2.26</b> | <b>90.09<math>\pm</math>0.88</b> | <b>70.97<math>\pm</math>3.49</b> | 95.56 $\pm$ 0.68 | 68.91 $\pm$ 0.78                 | 19.33 $\pm$ 0.61 |
